# Supplementary material
Source: Elsevier journal article supplement (https://www.sciencedirect.com/science/article/pii/S1130140618300123)
Supplement: mmc1 [file S1130140618300123:mmc1.docx]

**Appendix A. Supplementary data**

The *G. lucidum* KT805317 sequence of ITS corresponds to the strain used in this study. This strain is recovered with a high degree of support within the monophyletic group assigned as *G. lucidum* by Yang and Feng1. This finding corroborates the correct taxonomic assignment (Fig. 1).

**Figure caption**

Figure 1. The strict consensus tree of the two most-parsimonious trees. ITS phylogenetic analysis for *Ganoderma lucidum* inferred from parsimony. Length = 78. Consistency index = 0.9103. Retention index = 0.7308. Bootstrap values >50% are shown above branches.

**Reference**

1. Yang ZL, Feng B. What is the Chinese “Lingzhi”? – a taxonomic mini-review. *Mycology* 4: 1–4, 2013.
